# Supplementary material
Source: PubMed Central journal article supplement (PMC2663750)
Supplement: pp.108.132928_10.pdf [file pp.108.132928_10.pdf]

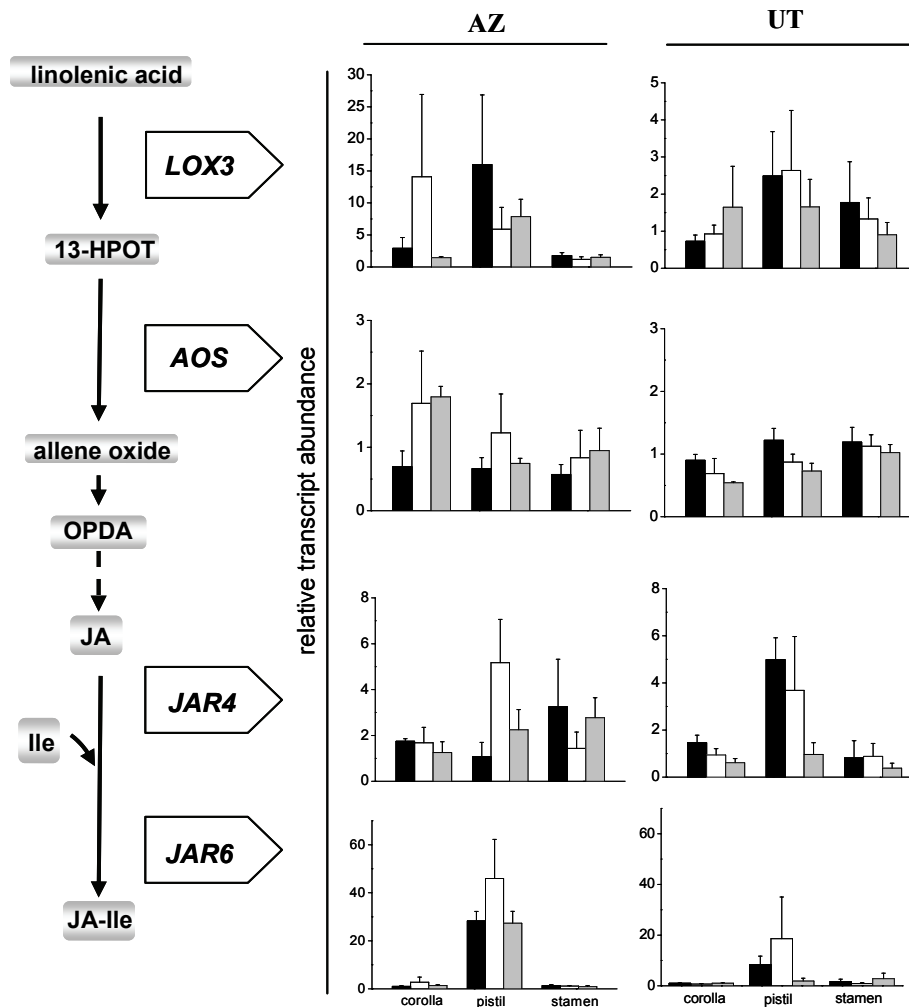

**Supplemental Figure S9:** Transcript accumulation of genes involved in jasmonate synthesis and in the conjugation step of JA with Ile in the oxylipin pathway. Left panel shows a simplified model of the oxylipin pathway: A 13-lipoxygenase (*LOX3*) oxygenates linolenic acid to 13-HPOT (13-hydroperoxide linolenic acid) which is further converted to allene oxide and OPDA (12-oxo-phytodienoic acid) by *AOS* (allene oxide synthase). OPDA is converted to JA, and the conjugation of JA to Ile is mediated by *JAR4* (jasmonate resistant 4) and *JAR6* (jasmonate resistant 6). Relative transcript abundance of (A) *LOX3*, (B) *AOS*, (C) *JAR4* and (D) *JAR6* in corolla, pistil and stamen of 3 to 5 replicated wild-type (black bars) and IRsys line 1 (white bars) and IRsys line 2 (gray bars) plants of AZ (left panel) and UT (right panel) plants. Asterisks represent significant differences from WT values of each accession (as determined by ANOVA followed by Bonferroni-corrected post-hoc test).
